# Supplementary material
Source: PubMed Central journal article supplement (PMC5115957)
Supplement: NIHMS829196-supplement-7.pdf [file NIHMS829196-supplement-7.pdf]

| Primary Transplant          | % of Peripheral Blood |                                    |            |           |            |
|-----------------------------|-----------------------|------------------------------------|------------|-----------|------------|
|                             | % CD45.2 <sup>+</sup> | % CD45.2 <sup>+</sup> Granulocytes | B Cells    | T Cells   | Myeloid    |
| <b>Total</b>                | 20.97±5.16            | 35.24±7.96                         | 9.74±3.09  | 3.34±1.90 | 6.96±1.55  |
| <b>GFP<sup>Hi</sup></b>     | 30.25±6.04            | 64.60±6.27                         | 14.01±3.50 | 2.66±1.47 | 12.50±1.77 |
| <b>GFP<sup>Lo</sup></b>     | 10.07±3.16            | 22.56±6.57                         | 5.85±2.38  | 0.91±0.38 | 2.96±0.95  |
| <b>Secondary Transplant</b> |                       |                                    |            |           |            |
| <b>Total</b>                | 14.55±2.87            | 20.54±7.98                         | 5.97±1.33  | 4.06±1.29 | 4.28±1.65  |
| <b>GFP<sup>Hi</sup></b>     | 12.03±3.95            | 29.70±7.58                         | 11.61±5.79 | 1.13±0.46 | 4.04±1.11  |
| <b>GFP<sup>Lo</sup></b>     | 1.30±0.65             | 1.40±0.49                          | 0.80±0.41  | 0.26±0.21 | 0.20±0.06  |

**Table S1 – Related to Figure 1. Donor cell contribution to peripheral blood.** White blood cell and granulocyte contributions, as well as donor derived lineage contributions to total peripheral blood at the end of primary (22 weeks) or secondary (24 weeks) transplantation. Data are represented as mean ± SEM of 8-14 mice per group from two independent experiments.

|                                          | Mice Reconstituted | Repopulating Cell Frequency (1/x) | Repopulating Cell Range (95% CI) | Cell #/ Mouse | Cell # Range (95% CI) | CD45.2 <sup>+</sup> Chimerism (% ± SEM) |
|------------------------------------------|--------------------|-----------------------------------|----------------------------------|---------------|-----------------------|-----------------------------------------|
| <b>GFP<sup>Lo</sup> CD41<sup>+</sup></b> | 6/12               | 21.6                              | 9.57<x<49.0                      | 0.69          | 1.57>x>0.31           | 1.12±0.67%                              |
| <b>GFP<sup>Lo</sup> CD41<sup>-</sup></b> | 7/11               | 14.8                              | 6.85<x<32.1                      | 1.01          | 2.19>x>0.47           | 13.09±11.73%                            |
| <b>GFP<sup>Hi</sup> CD41<sup>+</sup></b> | 4/6                | 13.7                              | 4.87<x<38.2                      | 1.09          | 3.08>x>0.39           | 37.59±19.55%                            |
| <b>GFP<sup>Hi</sup> CD41<sup>-</sup></b> | 7/9                | 9.97                              | 4.42<x<22.5                      | 1.50          | 3.39>x>0.67           | 27.70±6.62%                             |

**Table S2 – Related to Figure 3. Limiting dilution analysis of aging HSC populations.** CD45.2<sup>+</sup> chimerism was determined at 24 weeks in primary transplantation, and averaged between all mice considered repopulated regardless of retrospectively identified repopulating cell type.

**Table S3: Antibody Panel Related to STAR Methods**

|                                             | Lineage Cocktail |                  |                |                  |                  | Stem/progenitor Panel            |                           |                             |                      |                |                       |                   |                |                  |      | Cell Cycle  |             | Peripheral Blood |     |      |               | Viability |                 |               |            |
|---------------------------------------------|------------------|------------------|----------------|------------------|------------------|----------------------------------|---------------------------|-----------------------------|----------------------|----------------|-----------------------|-------------------|----------------|------------------|------|-------------|-------------|------------------|-----|------|---------------|-----------|-----------------|---------------|------------|
|                                             | CD3e             | B220             | CD11b          | Gr1              | Ter119           | Streptavidin PE/Cy5 or eFluor450 | c-KIT (PE or APC)         | Sca-1 (PacificBlue)         | CD48 (Biotin)        | Flk2 (Biotin)  | CD150 (PE/Cy7)        | CD41 (APC)        | IL-7R $\alpha$ | Fc $\gamma$ RIII | CD34 | Ki67 (PE)   | DNA Content | CD45.2           | CD4 | CD8a | B220 (PE/Cy7) |           | CD11b (APC/Cy7) | Gr1 (APC/Cy7) |            |
| HSC panel (UBC Analysis)                    | 17A2 (Biotin)    | RA3-6B2 (Biotin) | M1/70 (Biotin) | R86-8C5 (Biotin) | TER-119 (Biotin) | PE/Cy5 or eFluor450              | 288 (PE or APC)           | D7 (APC/Cy7 or PacificBlue) | HM48-1 (Biotin)      | A2F10 (Biotin) | TC15-12F12.2 (PE/Cy7) | eBiomWreg31 (APC) |                |                  |      |             |             |                  |     |      |               |           |                 |               | DAPI or PI |
| HSC panel (Cell Cycle)                      | 17A2 (Biotin)    | RA3-6B2 (Biotin) | M1/70 (Biotin) | R86-8C5 (Biotin) | TER-119 (Biotin) | PE/Cy5 or APC                    | 288 (FITC or PerCP/Cy5.5) | D7 (APC/Cy7 or PacificBlue) | HM48-1 (Biotin)      | A2F10 (Biotin) | TC15-12F12.2 (PE/Cy7) | eBiomWreg31 (APC) |                |                  |      | SoIA15 (PE) |             |                  |     |      |               |           |                 |               | DAPI       |
| HSPC Analysis (After Transplantation)       | 17A2 (Biotin)    | RA3-6B2 (Biotin) | M1/70 (Biotin) | R86-8C5 (Biotin) | TER-119 (Biotin) | APC/Cy7                          | 288 (PE)                  | D7 (PacificBlue)            | HM48-1 (PerCP/Cy5.5) |                | TC15-12F12.2 (PE/Cy7) | eBiomWreg31 (APC) |                |                  |      |             |             |                  |     |      |               |           |                 |               | DAPI       |
| Myeloid Progenitors (After Transplantation) | 17A2 (Biotin)    | RA3-6B2 (Biotin) | M1/70 (Biotin) | R86-8C5 (Biotin) | TER-119 (Biotin) | APC/Cy7                          | 288 (APC)                 | D7 (PacificBlue)            |                      |                |                       |                   |                |                  |      |             |             |                  |     |      |               |           |                 |               | DAPI       |
| CLP (After Transplantation)                 | 17A2 (Biotin)    | RA3-6B2 (Biotin) | M1/70 (Biotin) | R86-8C5 (Biotin) | TER-119 (Biotin) | APC/Cy7                          | 288 (APC)                 | D7 (PacificBlue)            |                      | A2F10 (PE)     |                       |                   |                |                  |      |             |             |                  |     |      |               |           |                 |               | DAPI       |
| Peripheral Blood                            |                  |                  |                |                  |                  |                                  |                           |                             |                      |                |                       |                   |                |                  |      |             |             |                  |     |      |               |           |                 |               | DAPI       |

ebioscience  
Biollegend  
Sigma
